# Supplementary material
Source: PubMed Central journal article supplement (PMC3681430)

**Bone marrow cells are a source of undifferentiated cells to prevent Sjögren's syndrome and to preserve salivary glands function in the non-obese diabetic mice**

The International Journal of Biochemistry & Cell Biology Volume 42, Issue 11 2010 1893 - 1899

## Appendix A. Supplementary data.

Supplementary Fig. 1 Effect of treatment on the saliva electrolytes. Overall, the level of electrolytes decreased in BM cells-treated group during the post-transplantation period when compared to their levels at the beginning of experiment. Levels of Na<sup>+</sup> and Cl<sup>-</sup> decreased at week 44 post-treatment in BM cells-transplanted group compared to week 4. The level of K<sup>+</sup>, however, slightly increased. Levels of Cl<sup>-</sup> and Ca<sup>2+</sup> did not change in CFA group. Electrolytes concentration increased in control mice over the course of experiment. However, none of these changes from panels A, B, C were statistically significant.

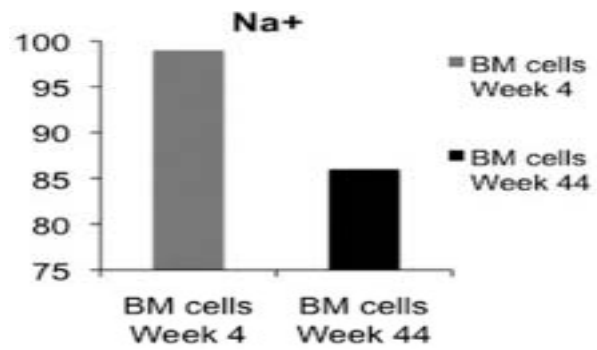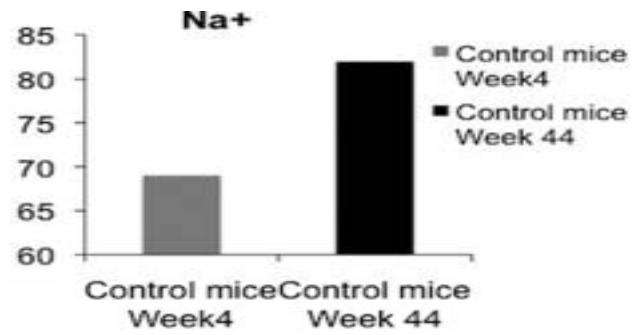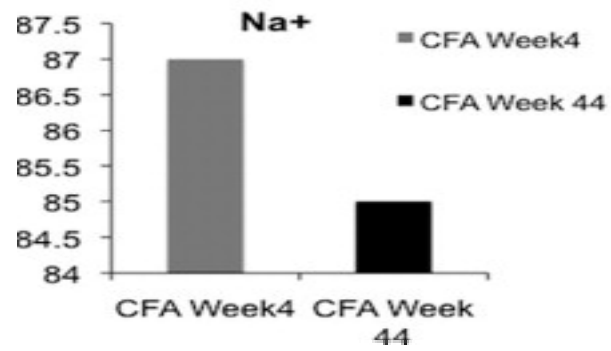

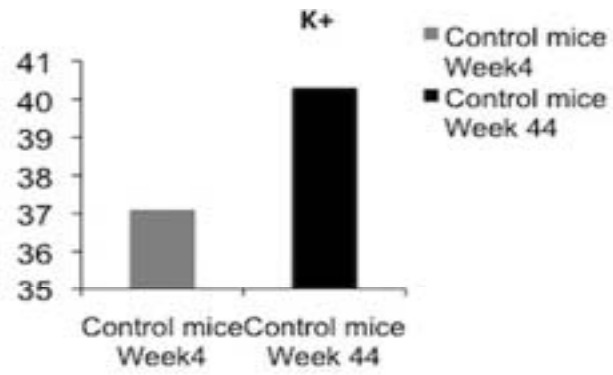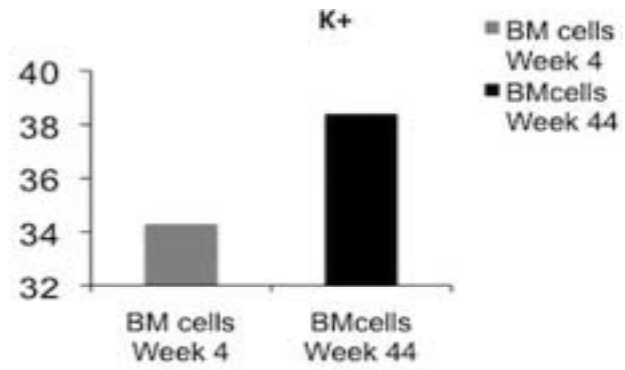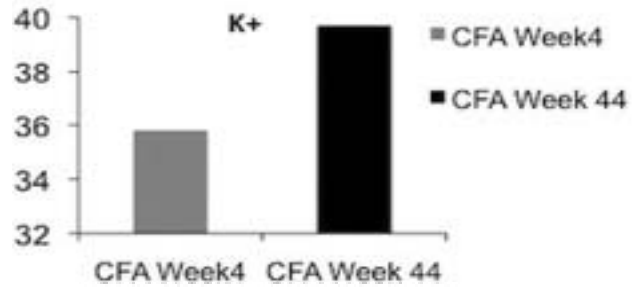

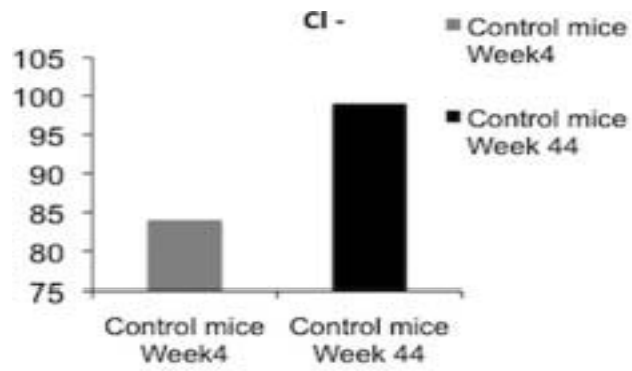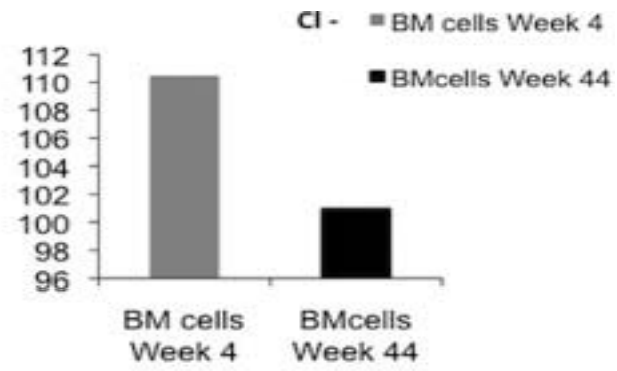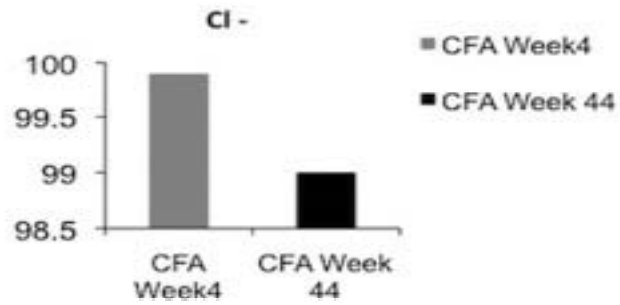

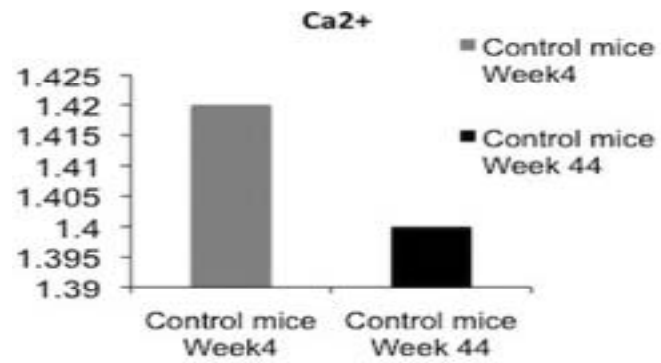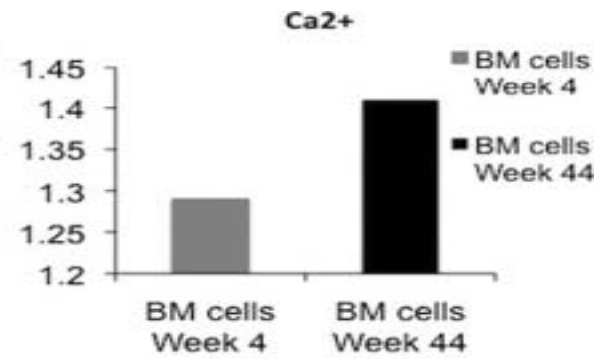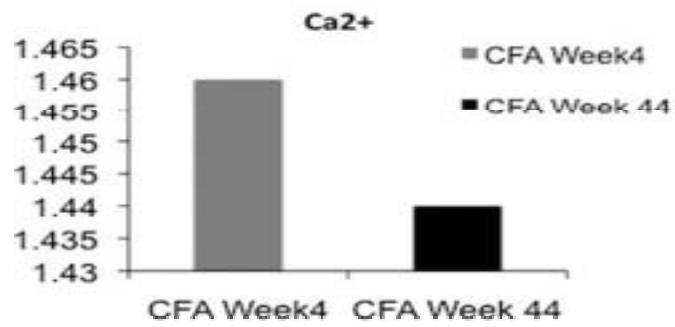

Supplement: NIHMS467144-supplement-Suppl__Files.pdf [file NIHMS467144-supplement-Suppl__Files.pdf]
